# Supplementary material for: A theoretical perspective on the structure and thermodynamics of secondary organic aerosols from toluene: molecular hierarchical synergistic effects
Source: Royal Society of Chemistry journal article supplement (doi:10.1039/d1en00959a), 2022-01-01
Supplement: d1en00959a1.pdf [file d1en00959a1.pdf]

*Supporting Information*

**A Theoretical Perspective of the Structure and Thermodynamics of Secondary  
Organic Aerosols from Toluene: Molecular Hierarchical Synergistic Effects**

**Table S1** Compositions of the mimicked systems.

| System | N <sub>C7H6O2</sub> | N <sub>C7H6O</sub> | N <sub>C3H4O3</sub> | N <sub>H2SO4</sub> | N <sub>H2O</sub> | N <sub>N2</sub> | N <sub>O2</sub> | N <sub>H2SO4/H2O</sub> | T    |
|--------|---------------------|--------------------|---------------------|--------------------|------------------|-----------------|-----------------|------------------------|------|
| #01    | 50                  | 205                | 218                 | 46                 | 114              | 900             | 240             | 0.4                    | 298K |
| #02    | 50                  | 205                | 218                 | 37                 | 123              | 900             | 240             | 0.3                    |      |
| #03    | 50                  | 205                | 218                 | 27                 | 133              | 900             | 240             | 0.2                    |      |
| #04    | 50                  | 205                | 218                 | 15                 | 145              | 900             | 240             | 0.1                    |      |
| #05    | 50                  | 205                | 0                   | 40                 | 120              | 900             | 240             | 0.33                   |      |
| #06    | 0                   | 205                | 218                 | 40                 | 120              | 900             | 240             | 0.33                   |      |
| #07    | 50                  | 0                  | 218                 | 40                 | 120              | 900             | 240             | 0.33                   |      |
| #08    | 50                  | 205                | 218                 | 40                 | 120              | 900             | 240             | 0.33                   |      |
| #09    | 39                  | 196                | 238                 | 40                 | 120              | 900             | 240             | 0.33                   |      |
| #10    | 33                  | 200                | 240                 | 40                 | 120              | 900             | 240             | 0.33                   |      |
| #11    | 25                  | 233                | 215                 | 40                 | 120              | 900             | 240             | 0.33                   |      |
| #12    | 50                  | 205                | 218                 | 40                 | 120              | 900             | 240             | 0.33                   | 273K |
| #13    | 50                  | 205                | 218                 | 40                 | 120              | 900             | 240             | 0.33                   | 283K |
| #14    | 50                  | 205                | 218                 | 40                 | 120              | 900             | 240             | 0.33                   | 293K |
| #15    | 50                  | 205                | 218                 | 40                 | 120              | 900             | 240             | 0.33                   | 303K |
| #16    | 50                  | 205                | 218                 | 40                 | 120              | 900             | 240             | 0.33                   | 313K |
| #17    | 50                  | 205                | 218                 | 40                 | 120              | 900             | 240             | 0.33                   | 323K |

The molar ratios of organics, including benzaldehyde, benzoic acid, and pyruvic acid, are provided from the mimicked chamber experiments reported by Qi *et al.*<sup>[S1]</sup>.

**Table S2.** Gibbs free energy ( $G$ ) of single molecules and dimers calculated at M06-2X/6-311+G(3df,3pd) level.

| Dimer                                                                                      | $G$ (Hartree) |
|--------------------------------------------------------------------------------------------|---------------|
| C <sub>7</sub> H <sub>6</sub> O <sub>2</sub>                                               | -420.710      |
| C <sub>7</sub> H <sub>6</sub> O                                                            | -345.461      |
| C <sub>3</sub> H <sub>4</sub> O <sub>3</sub>                                               | -342.353      |
| H <sub>2</sub> O                                                                           | -700.277      |
| H <sub>2</sub> SO <sub>4</sub>                                                             | -76.423       |
| H <sub>2</sub> SO <sub>4</sub> -H <sub>2</sub> O                                           | -776.705      |
| H <sub>2</sub> SO <sub>4</sub> -C <sub>3</sub> H <sub>4</sub> O <sub>3</sub>               | -1042.642     |
| H <sub>2</sub> SO <sub>4</sub> -C <sub>7</sub> H <sub>6</sub> O <sub>2</sub>               | -1120.992     |
| H <sub>2</sub> SO <sub>4</sub> -C <sub>7</sub> H <sub>6</sub> O                            | -1045.743     |
| H <sub>2</sub> O-C <sub>3</sub> H <sub>4</sub> O <sub>3</sub>                              | -418.778      |
| H <sub>2</sub> O-C <sub>7</sub> H <sub>6</sub> O <sub>2</sub>                              | -497.129      |
| H <sub>2</sub> O-C <sub>7</sub> H <sub>6</sub> O                                           | -421.878      |
| C <sub>3</sub> H <sub>4</sub> O <sub>3</sub> -C <sub>7</sub> H <sub>6</sub> O <sub>2</sub> | -763.063      |
| C <sub>3</sub> H <sub>4</sub> O <sub>3</sub> -C <sub>7</sub> H <sub>6</sub> O              | -687.815      |
| C <sub>7</sub> H <sub>6</sub> O <sub>2</sub> -C <sub>7</sub> H <sub>6</sub> O              | -766.168      |

**Table S3.** Molecular compositions of mimicked systems for multicomponent SOA phase diagram.

| System | N<br>C7H6O2 | N<br>C7H6O | N<br>C3H4O3 | N<br>H2SO4 | N<br>H2O | N<br>N2 | N<br>O2 | N<br>H2SO4/H2O | N<br>HBs | E<br>(KJ/mol<br>) | Life<br>(ps) |
|--------|-------------|------------|-------------|------------|----------|---------|---------|----------------|----------|-------------------|--------------|
| #01    | 0           | 0          | 500         | 40         | 120      | 900     | 240     | 0.33           | 734      | -215.37           | 235.20       |
| #02    | 0           | 50         | 450         | 40         | 120      | 900     | 240     | 0.33           | 684      | -197.42           | 233.66       |
| #03    | 0           | 100        | 400         | 40         | 120      | 900     | 240     | 0.33           | 636      | -179.23           | 207.33       |
| #04    | 0           | 150        | 350         | 40         | 120      | 900     | 240     | 0.33           | 595      | -161.16           | 194.84       |
| #05    | 0           | 200        | 300         | 40         | 120      | 900     | 240     | 0.33           | 550      | -143.16           | 203.61       |
| #06    | 0           | 250        | 250         | 40         | 120      | 900     | 240     | 0.33           | 504      | -125.11           | 172.39       |
| #07    | 0           | 300        | 200         | 40         | 120      | 900     | 240     | 0.33           | 452      | -104.89           | 132.47       |
| #08    | 0           | 350        | 150         | 40         | 120      | 900     | 240     | 0.33           | 413      | -87.78            | 183.44       |
| #09    | 0           | 400        | 100         | 40         | 120      | 900     | 240     | 0.33           | 376      | -70.35            | 167.67       |
| #10    | 0           | 450        | 50          | 40         | 120      | 900     | 240     | 0.33           | 331      | -54.30            | 226.00       |
| #11    | 0           | 500        | 0           | 40         | 120      | 900     | 240     | 0.33           | 281      | -35.23            | 151.82       |
| #12    | 50          | 0          | 450         | 40         | 120      | 900     | 240     | 0.33           | 723      | -200.46           | 212.02       |
| #13    | 50          | 50         | 400         | 40         | 120      | 900     | 240     | 0.33           | 686      | -182.58           | 207.30       |
| #14    | 50          | 100        | 350         | 40         | 120      | 900     | 240     | 0.33           | 636      | -163.68           | 179.88       |
| #15    | 50          | 150        | 300         | 40         | 120      | 900     | 240     | 0.33           | 579      | -145.69           | 182.34       |
| #16    | 50          | 200        | 250         | 40         | 120      | 900     | 240     | 0.33           | 554      | -128.48           | 191.83       |
| #17    | 50          | 250        | 200         | 40         | 120      | 900     | 240     | 0.33           | 501      | -109.64           | 176.68       |
| #18    | 50          | 300        | 150         | 40         | 120      | 900     | 240     | 0.33           | 461      | -92.93            | 207.26       |
| #19    | 50          | 350        | 100         | 40         | 120      | 900     | 240     | 0.33           | 402      | -73.69            | 172.28       |
| #20    | 50          | 400        | 50          | 40         | 120      | 900     | 240     | 0.33           | 366      | -57.28            | 171.18       |
| #21    | 50          | 450        | 0           | 40         | 120      | 900     | 240     | 0.33           | 314      | -37.33            | 158.47       |
| #22    | 100         | 0          | 400         | 40         | 120      | 900     | 240     | 0.33           | 721      | -186.48           | 216.53       |
| #23    | 100         | 50         | 350         | 40         | 120      | 900     | 240     | 0.33           | 670      | -167.19           | 221.45       |
| #24    | 100         | 100        | 300         | 40         | 120      | 900     | 240     | 0.33           | 628      | -148.83           | 181.22       |
| #25    | 100         | 150        | 250         | 40         | 120      | 900     | 240     | 0.33           | 582      | -131.25           | 182.78       |
| #26    | 100         | 200        | 200         | 40         | 120      | 900     | 240     | 0.33           | 536      | -112.80           | 182.57       |
| #27    | 100         | 250        | 150         | 40         | 120      | 900     | 240     | 0.33           | 497      | -96.81            | 202.83       |
| #28    | 100         | 300        | 100         | 40         | 120      | 900     | 240     | 0.33           | 445      | -76.10            | 152.24       |
| #29    | 100         | 350        | 50          | 40         | 120      | 900     | 240     | 0.33           | 400      | -58.45            | 176.27       |
| #30    | 100         | 400        | 0           | 40         | 120      | 900     | 240     | 0.33           | 350      | -40.81            | 138.17       |
| #31    | 150         | 0          | 350         | 40         | 120      | 900     | 240     | 0.33           | 706      | -170.86           | 189.43       |
| #32    | 150         | 50         | 300         | 40         | 120      | 900     | 240     | 0.33           | 657      | -152.47           | 188.44       |
| #33    | 150         | 100        | 250         | 40         | 120      | 900     | 240     | 0.33           | 632      | -135.13           | 208.10       |
| #34    | 150         | 150        | 200         | 40         | 120      | 900     | 240     | 0.33           | 587      | -117.14           | 183.50       |
| #35    | 150         | 200        | 150         | 40         | 120      | 900     | 240     | 0.33           | 548      | -100.09           | 198.65       |

|     |     |     |     |    |     |     |     |      |     |         |        |
|-----|-----|-----|-----|----|-----|-----|-----|------|-----|---------|--------|
| #36 | 150 | 250 | 100 | 40 | 120 | 900 | 240 | 0.33 | 482 | -82.60  | 196.54 |
| #37 | 150 | 300 | 50  | 40 | 120 | 900 | 240 | 0.33 | 435 | -62.15  | 146.22 |
| #38 | 150 | 350 | 0   | 40 | 120 | 900 | 240 | 0.33 | 395 | -45.12  | 181.54 |
| #39 | 200 | 0   | 300 | 40 | 120 | 900 | 240 | 0.33 | 701 | -156.11 | 194.39 |
| #40 | 200 | 50  | 250 | 40 | 120 | 900 | 240 | 0.33 | 648 | -137.63 | 189.05 |
| #41 | 200 | 100 | 200 | 40 | 120 | 900 | 240 | 0.33 | 631 | -121.24 | 211.94 |
| #42 | 200 | 150 | 150 | 40 | 120 | 900 | 240 | 0.33 | 566 | -102.03 | 179.92 |
| #43 | 200 | 200 | 100 | 40 | 120 | 900 | 240 | 0.33 | 514 | -83.09  | 173.54 |
| #44 | 200 | 250 | 50  | 40 | 120 | 900 | 240 | 0.33 | 472 | -66.18  | 175.21 |
| #45 | 200 | 300 | 0   | 40 | 120 | 900 | 240 | 0.33 | 433 | -48.82  | 182.01 |
| #46 | 250 | 0   | 250 | 40 | 120 | 900 | 240 | 0.33 | 682 | -141.17 | 169.94 |
| #47 | 250 | 50  | 200 | 40 | 120 | 900 | 240 | 0.33 | 648 | -123.63 | 196.68 |
| #48 | 250 | 100 | 150 | 40 | 120 | 900 | 240 | 0.33 | 600 | -104.76 | 174.23 |
| #49 | 250 | 150 | 100 | 40 | 120 | 900 | 240 | 0.33 | 569 | -87.31  | 191.19 |
| #50 | 250 | 200 | 50  | 40 | 120 | 900 | 240 | 0.33 | 513 | -69.98  | 194.36 |
| #51 | 250 | 250 | 0   | 40 | 120 | 900 | 240 | 0.33 | 468 | -52.39  | 196.89 |
| #52 | 300 | 0   | 200 | 40 | 120 | 900 | 240 | 0.33 | 685 | -125.76 | 194.20 |
| #53 | 300 | 50  | 150 | 40 | 120 | 900 | 240 | 0.33 | 648 | -109.38 | 209.28 |
| #54 | 300 | 100 | 100 | 40 | 120 | 900 | 240 | 0.33 | 589 | -90.53  | 195.58 |
| #55 | 300 | 150 | 50  | 40 | 120 | 900 | 240 | 0.33 | 559 | -74.17  | 200.42 |
| #56 | 300 | 200 | 0   | 40 | 120 | 900 | 240 | 0.33 | 495 | -54.15  | 171.09 |
| #57 | 350 | 0   | 150 | 40 | 120 | 900 | 240 | 0.33 | 677 | -112.33 | 200.10 |
| #58 | 350 | 50  | 100 | 40 | 120 | 900 | 240 | 0.33 | 624 | -93.57  | 181.46 |
| #59 | 350 | 100 | 50  | 40 | 120 | 900 | 240 | 0.33 | 568 | -76.10  | 174.30 |
| #60 | 350 | 150 | 0   | 40 | 120 | 900 | 240 | 0.33 | 526 | -57.76  | 185.08 |
| #61 | 400 | 0   | 100 | 40 | 120 | 900 | 240 | 0.33 | 670 | -98.77  | 199.34 |
| #62 | 400 | 50  | 50  | 40 | 120 | 900 | 240 | 0.33 | 610 | -78.72  | 165.56 |
| #63 | 400 | 100 | 0   | 40 | 120 | 900 | 240 | 0.33 | 573 | -61.06  | 185.04 |
| #64 | 450 | 0   | 50  | 40 | 120 | 900 | 240 | 0.33 | 646 | -82.62  | 194.36 |
| #65 | 450 | 50  | 0   | 40 | 120 | 900 | 240 | 0.33 | 596 | -64.30  | 193.05 |
| #66 | 500 | 0   | 0   | 40 | 120 | 900 | 240 | 0.33 | 621 | -66.93  | 197.81 |

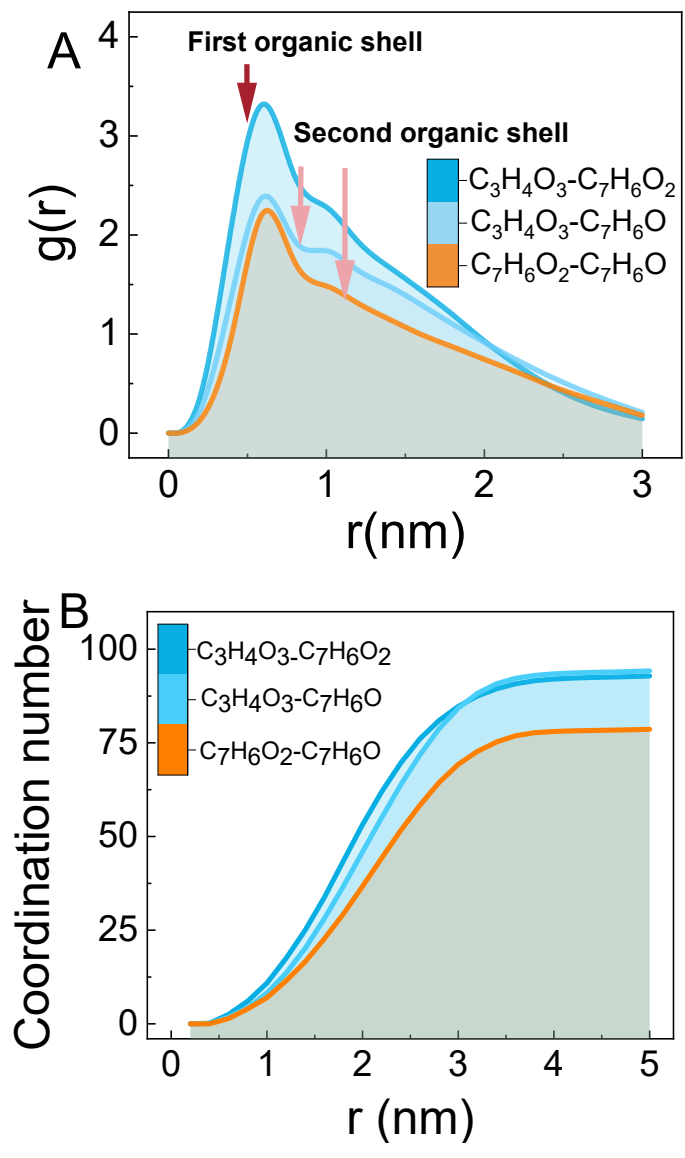

**Figure S1.** Hierarchical architecture characterization: (A) radial distribution function and (B) coordination number for different organics.

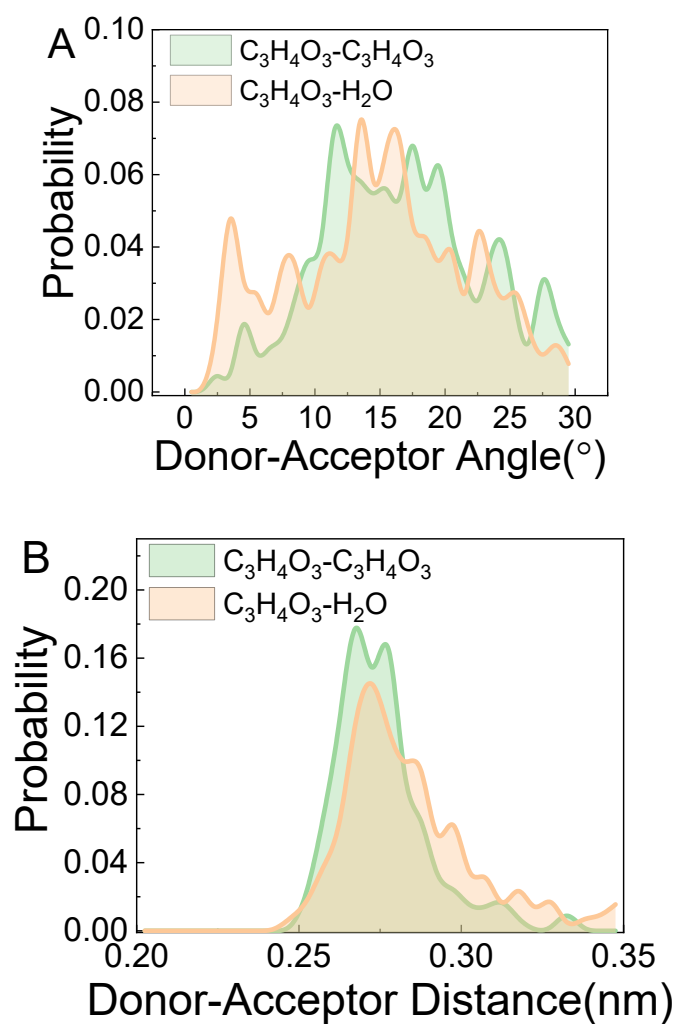

**Figure S2.** The probability distributions of angle and distance for donor-acceptor.

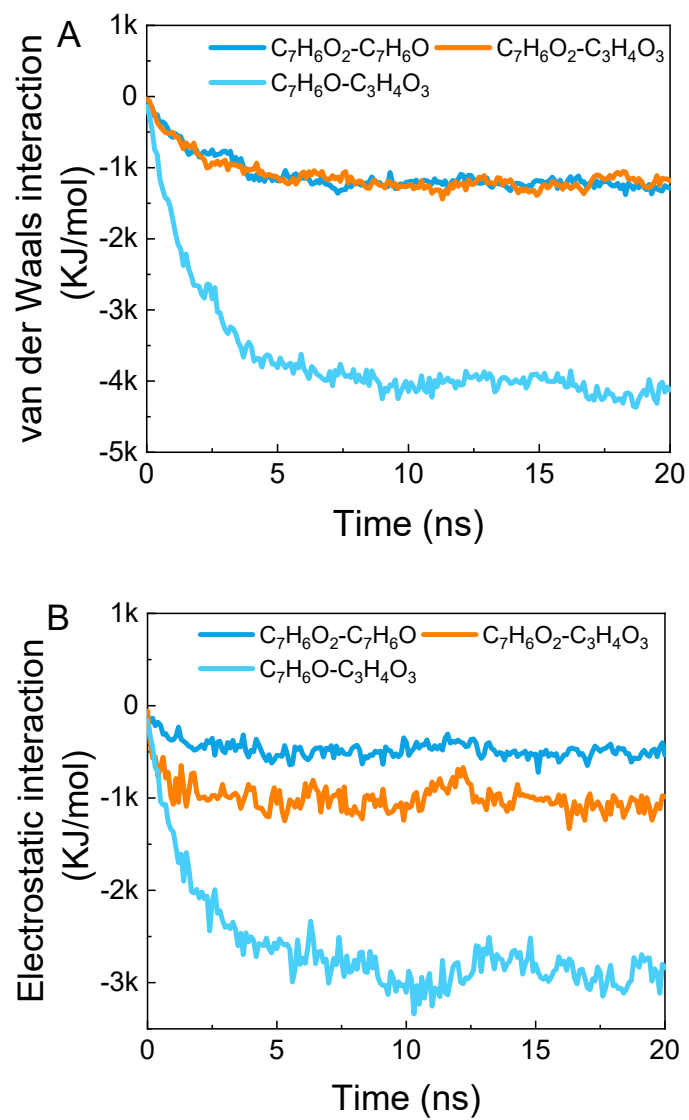

**Figure S3.** Intermolecular interactions: (A) van der Waals and (B) electrostatic energy profiles. The organic ratio of benzoic acid/benzaldehyde/PA is 1.0: 6.1: 7.3.



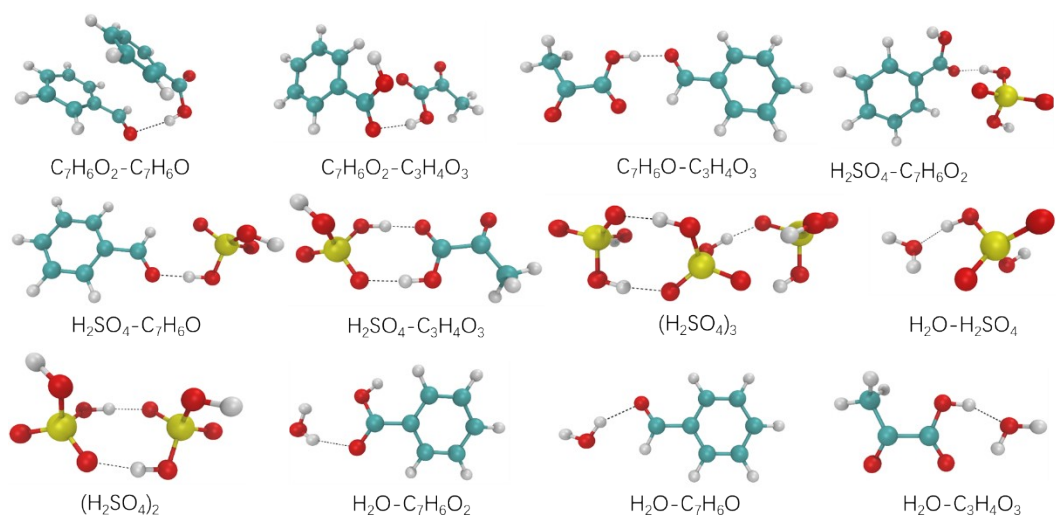

**Figure S4.** The binding configurations of intra-molecules, which are calculated by the DFT method at the M062X Def2qzvp level.

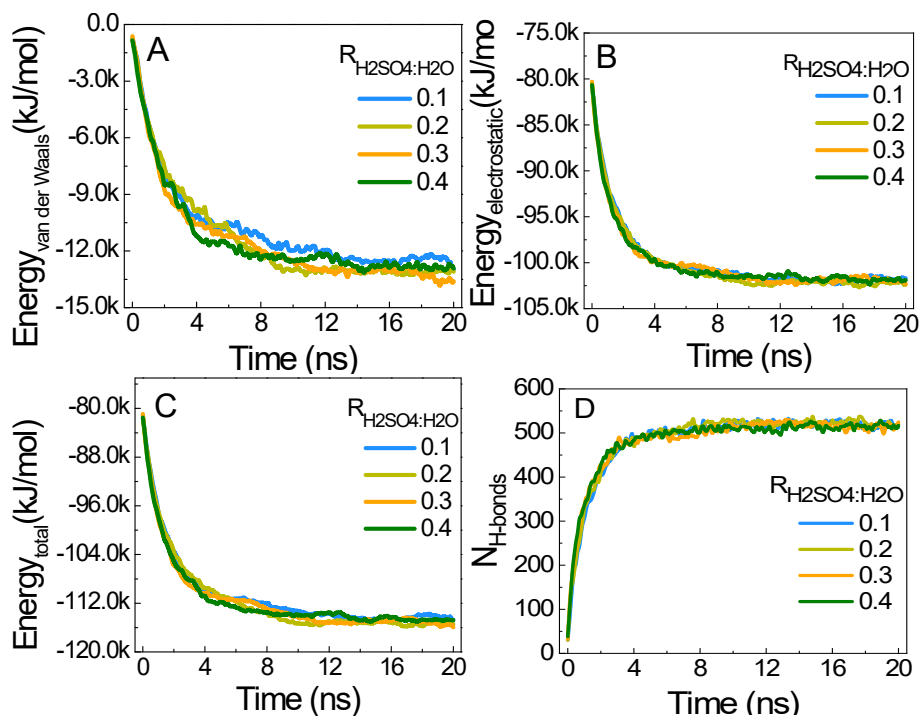

**Figure S5.** Thermodynamics analysis of atmospheric aerosol with different organic compositions: (A) Van der Waals interaction energy, (B) electrostatic interaction energy, (C) total energy, (D) number of hydrogen bonds.

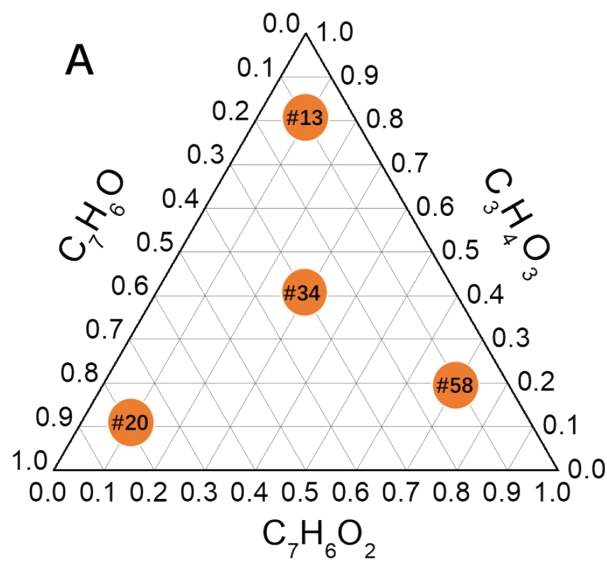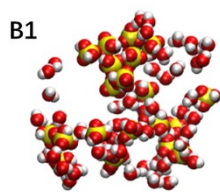

$\text{H}_2\text{SO}_4\text{-H}_2\text{O}$  Cores

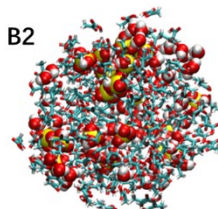

$\text{H}_2\text{SO}_4\text{-H}_2\text{O}@C_3\text{H}_4\text{O}_3$   
Core-shell

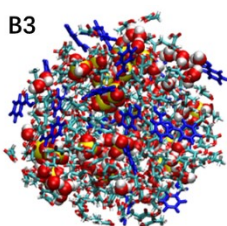

$\text{H}_2\text{SO}_4\text{-H}_2\text{O}@C_3\text{H}_4\text{O}_3/C_7\text{H}_6\text{O}_2$   
Core-shell

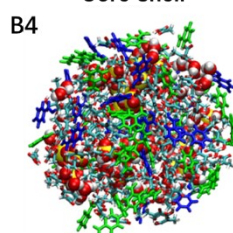

$\text{H}_2\text{SO}_4\text{-H}_2\text{O}@C_3\text{H}_4\text{O}_3/$   
 $C_7\text{H}_6\text{O}_2/C_7\text{H}_6\text{O}$  Core-shell

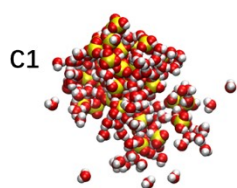

$\text{H}_2\text{SO}_4\text{-H}_2\text{O}$  Cores

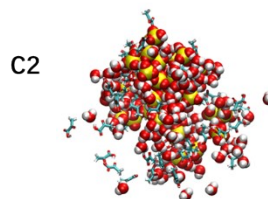

$\text{H}_2\text{SO}_4\text{-H}_2\text{O}@C_3\text{H}_4\text{O}_3$   
Core-shell

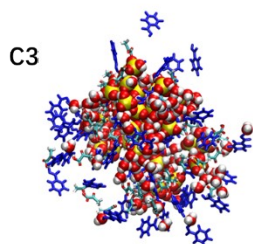

$\text{H}_2\text{SO}_4\text{-H}_2\text{O}@C_3\text{H}_4\text{O}_3/$   
 $C_7\text{H}_6\text{O}_2$  Core-shell

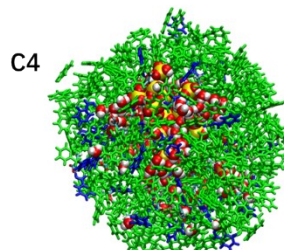

$\text{H}_2\text{SO}_4\text{-H}_2\text{O}@C_3\text{H}_4\text{O}_3/$   
 $C_7\text{H}_6\text{O}_2/C_7\text{H}_6\text{O}$  Core-shell

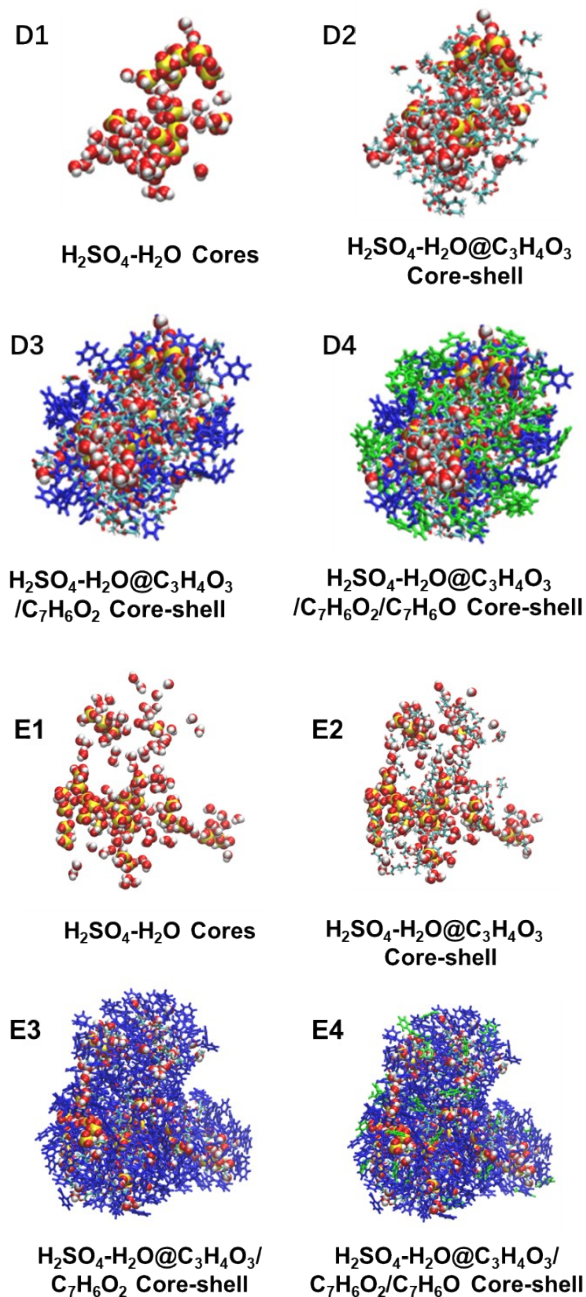

**Figure S6.** The Hierarchical internal structure of core-shelled nanoparticles under different organic ratios: (A) schematics of the phase diagram for a ternary organic mixture, The organic ratio of benzoic acid/benzaldehyde/PA is (B)1.0: 1.0: 8.0, (C) 1:8:2, (D) 3:3:4, (E) 7:1:2.

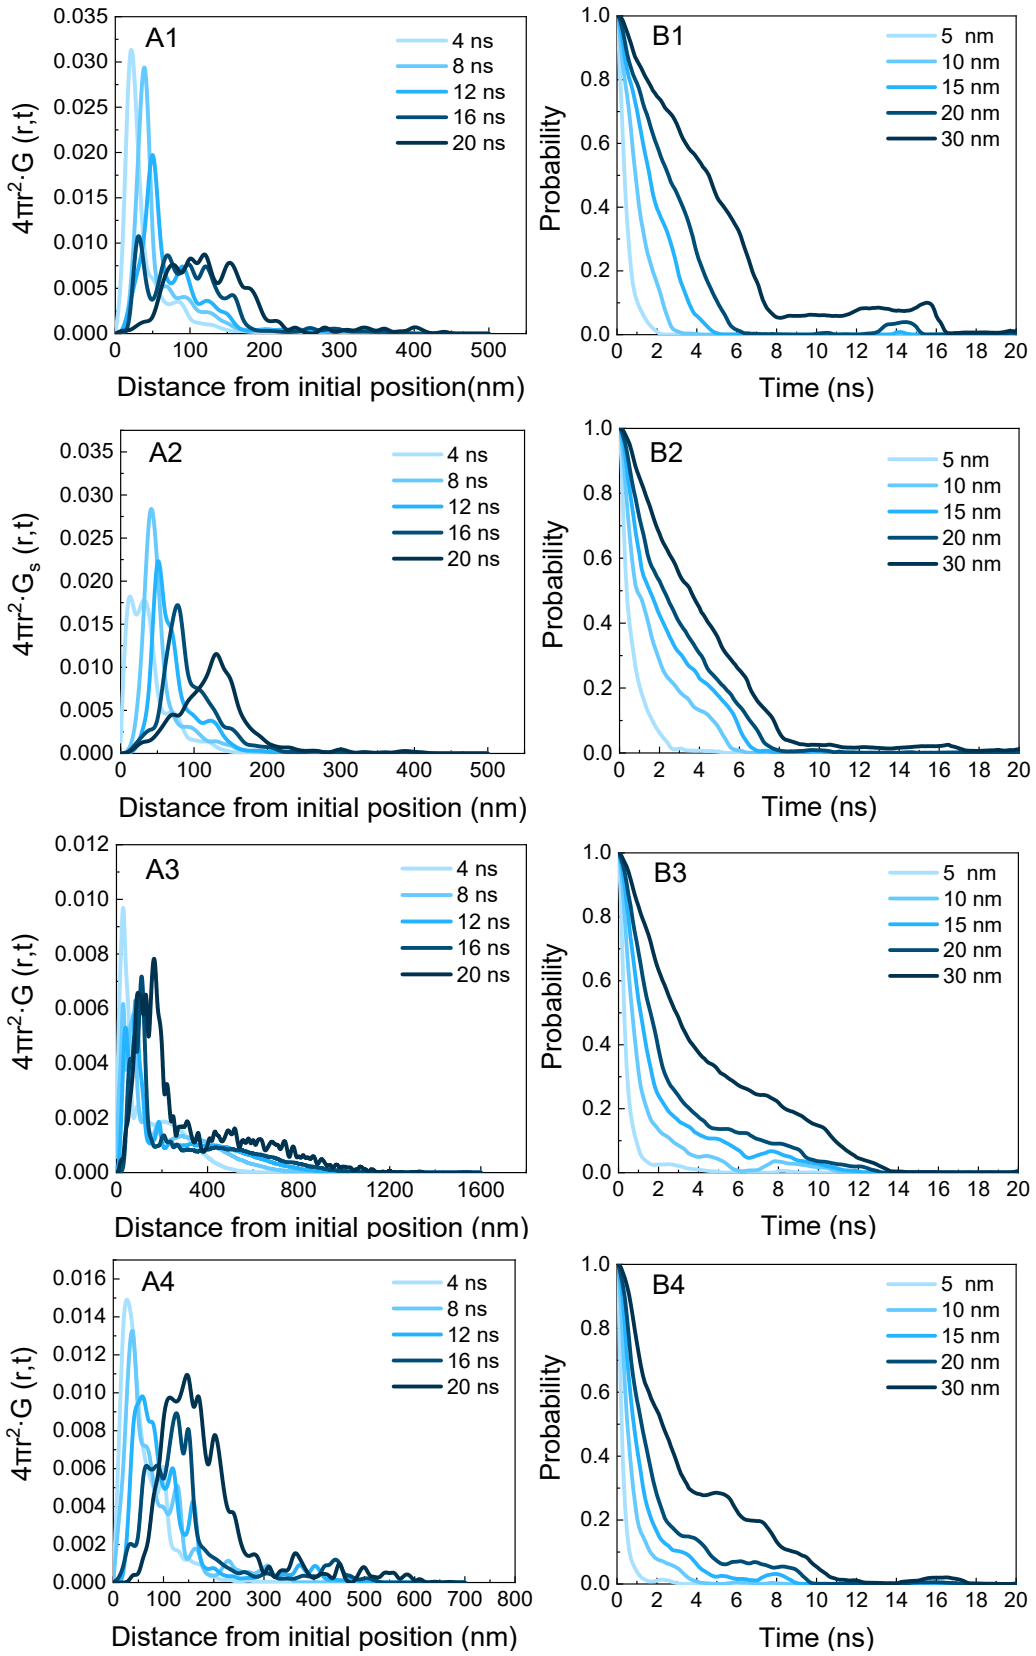

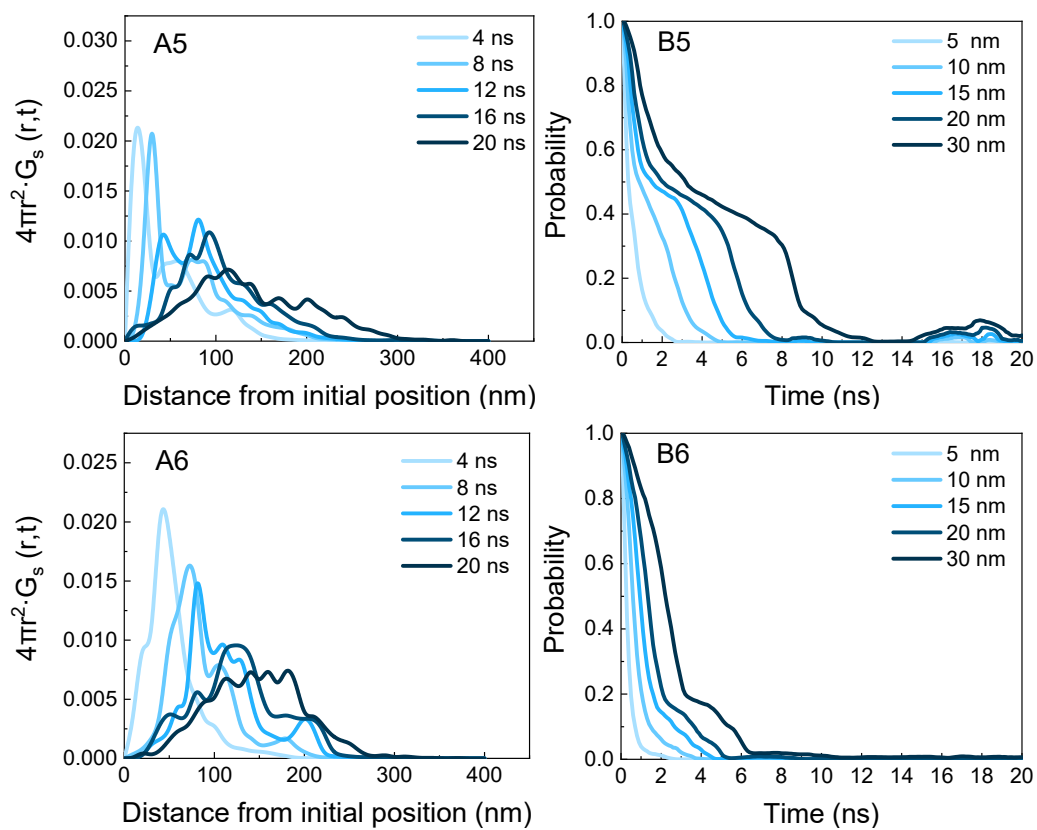

**Figure S7.** Migration and diffusion properties under different temperatures: (A1-A6) evolution of the probability of TSOA nanoparticles under different moving distances, and (B1-B6) van Hove function in terms of distance from the initial position under different simulation time. The simulated temperature increases from 273 to 323 K.

## References

[S1] Wu, X. Cytotoxicity Studies on Main Components of Toluene Secondary Organic Aerosol. Master thesis, Harbin Institute of Technology, 2018.
